# Supplementary material for: Effectiveness of Using a Drug Cost Calculator to Improve Patients’ Understanding of Drug Costs in Advanced Breast Cancer: A Multicenter, Randomized Controlled Trial
Source: Research Square preprint supplement (doi:10.21203/rs.3.rs-8037842/v1), 2025-12-11
Supplement: Supplementary file 3 [file f50373c8543e1be858cd6ca2.pdf]

## Online Resource 2

### **Effectiveness of Using a Drug Cost Calculator to Improve Patients' Understanding of Drug Costs in Advanced Breast Cancer: A Multicenter, Randomized Controlled Trial**

#### *Supportive Care in Cancer*

Sayaka Kuba, MD, PhD; Hiroki Moriuchi, MD, PhD; Kosho Yamanouchi, MD, PhD; Shigeto Maeda, MD, PhD; Megumi Matsumoto, MD, PhD; Hiroshi Yano, MD, PhD; Masahiro Oikawa, MD, PhD; Michi Morita, MD, PhD; Momoko Akashi, MD, PhD; Aya Tanaka, MD, PhD; Ryota Otsubo, MD, PhD; Kengo Kanetaka, MD, PhD; Keitaro Matsumoto, MD, PhD; Susumu Eguchi, MD, PhD

#### **Corresponding author**

Dr. Sayaka Kuba

Nagasaki University Graduate School of Biomedical Sciences, Department of Surgery, Nagasaki, Japan

E-mail: [skuba@nagasaki-u.ac.jp](mailto:skuba@nagasaki-u.ac.jp)

**Supplementary Fig. 1** Comparison of scores for perceived importance of medication costs based on the health insurance system's categories for out-of-pocket maximums

**Supplementary Fig. 2** Comparison of scores for the perceived importance of medication costs based on the COmprehensive Score for Financial Toxicity (COST) grade

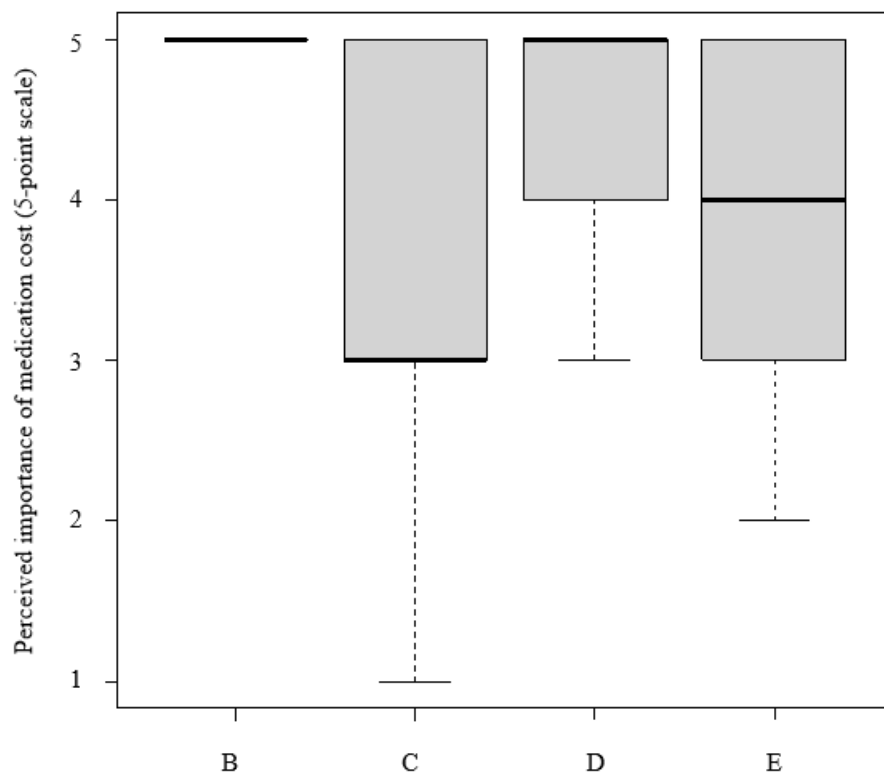

**Supplementary Fig. 1** Comparison of scores for the perceived importance of medication costs based on the health insurance system's categories for out-of-pocket maximums

The thick horizontal lines indicate median scores, boxes represent interquartile ranges, and whiskers show the range. A significant difference was observed among categories ( $P = 0.0106$ , Kruskal–Wallis test).

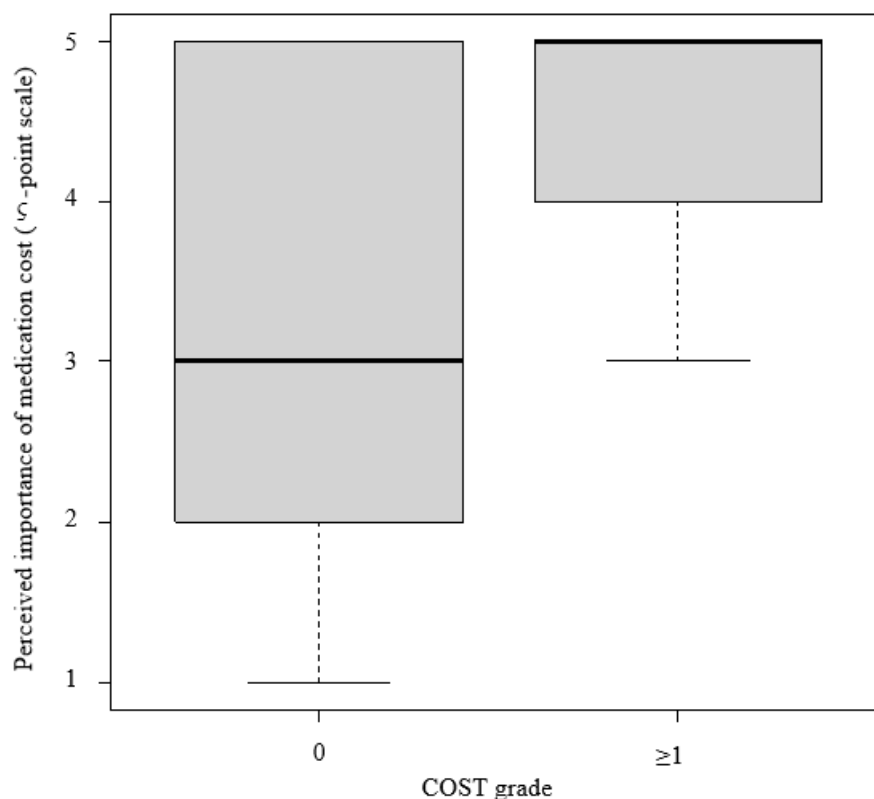

**Supplementary Fig. 2** Comparison of scores for the perceived importance of medication costs based on the COmprehensive Score for Financial Toxicity grade

The COmprehensive Score for Financial Toxicity (COST) evaluates patients' financial toxicity. Patients with higher COST grades ( $\geq 1$ ) rated the importance of medication costs higher than those with grade 0. The thick horizontal lines indicate median scores, boxes represent interquartile ranges, and whiskers show the range.
